# Supplementary material
Source: publisher site journal article supplement (https://oneecosystem.pensoft.net/article/download/suppl/5494972/)
Supplement: Supplementary file 1

Supplementary material 1 *Table A: Proposal of a classification system for ecosystem types (ETs) in Germany, assignment to the European ecosystem types according to EUNIS and to the CLC types of the database LBM-DE*

| **Main ET** | **Sub-ET** | **EUNIS Code** | **EUNIS-Ecosystem name** | **CLC Code** | **CLC-Name** |
| --- | --- | --- | --- | --- | --- |
| 1 Semi-natural open areas | 11 Natural grassland and heathland | E1(n.94-98)  E2.1-3,7-8  E3, 4.3-5  E5.1,4-5  E6 | Dry grasslands, Mesic grasslands, (Seasonally) wet grasslands,  Alpine and subalpine grasslands  Woodland fringes and clearings and tall forb stands (but Pteridium aquilinum fields)  Inland salt steppes | 321 | Natural grassland |
| B1.5-1.6  E5.3  F9  F2.2-4  F3.1  F4.1-2  G5.6-7 | Coastal dunes and sandy shores  Woodland fringes and clearings and tall forb stands ([Pteridium aquilinum fields](https://eunis.eea.europa.eu/habitats/525" \o "[Pteridium aquilinum] fields))  Riverine and fen scrubs  Arctic, alpine and subalpine scrub  Temperate thickets and scrub  Temperate shrub heathland  Early-stage woodland / coppice | 322 | Moors and heathland |
| 12 Wetlands | C2.1  C2.5  C3.1-3.2, 3.41, 3.44, 3.45  D4  D5  D6 | Springs, spring brooks  Temporary running waters  Littoral zone of inland surface waterbodies  Base-rich fens, calcareous spring mires  Sedge and reedbeds  Inland saline and brackish marshes and reedbeds | 411 | Inland marshes |
| D1  D2  X04, X28y | Raised and blanket bogs  Valley mires, poor fens and transition mires  Raised / blanked bog complexes | 412 | Peatbogs |
| A2.51, 533-53B, 54 (div.) | Lower / mid-upper saltmarshes and saline and brackish reed, rush and sedge beds | 421 | Coastal salt marshes |
| 13 Open spaces with no or little vegetation | B1.1-4, 1.8  B2  C3.6-7  E1.94-98  F4  H5.3 | Coastal dunes and sandy shores  Coastal shingle  Unvegetated or sparsely vegetated shores (diff. sediments)  Dry grasslands  Temperate shrub heathland  Sparsely- or un-vegetated habitats | 331 | Beaches, dunes and sand plains |
| B3  C3.8  F4  H2, H3.1-3.61 | Rock cliffs, ledges and shores, including the supralittoral  Inland spray- and steam-dependent habitats  Temperate shrub heathland  Screes, Inland cliffs, rock pavements and outcrops | 332 | Bare rock |
| E4.1-2  F2.1  H3.62  H5.4  X05 | Alpine and subalpine grasslands  Arctic, alpine and subalpine scrub  Sparsely vegetated weathered rock and outcrop habitats  Dry organic substrates with very sparse or no vegetation  Snow patches | 333 | Sparsely vegetated areas |
| H5.5 | Burnt areas with very sparse or no vegetation | 334 | Burnt areas |
| H4 | Snow or ice-dominated habitats | 335 | Glaciers and perpetual snow |
| 2 Forest and grove areas | 21 Forest | B1.72  G1.1-C  G5.72 | Coastal dunes and sandy shores  Broadleaved deciduous woodland  Early-stage broadleaved deciduous plantations | 311 | Broad-leaved forest |
| B1.71,73-74  G3  G5.74  G5.76 | Coastal dunes and sandy shores  Coniferous woodland  Early-stage coniferous plantations  Trees planted for early whole-tree harvesting | 312 | Coniferous forest |
| G4  G5.75 | Mixed deciduous and coniferous woodland  Early-stage mixed broadleaved and coniferous plantations | 313 | Mixed forest |
| 22 Grove | X13-16  X20 | Land sparsely wooded with broadleaved deciduous resp. coniferous trees  Treeline ecotones | 324 | Transitional woodland/shrub |
| 3 Agrarland | 31 Arable land | I1.1-2, 1.5  J2.4 | Arable land and market gardens  Agricultural constructions | 211 | Non-irrigated arable land |
| FB4 | Vineyards | 221 | Vineyards |
| FB1-3  G1.D | Shrub plantations  Fruit and nut tree orchards | 222 | Fruit tree and berry plantations |
| 32 Grassland | B1  E2.61-62  E7  FA  X09-10 | Coastal dunes and sandy shores  Mesic grasslands  Sparsely wooded grasslands  Hedgerows  Pasture woods | 231 | Pasture, meadows and other permanent grasslands under agricultural use |
| 33 Heterogeneous agricultural area | I.2  X07 | Cultivated areas of gardens and parks  Intensively-farmed crops interspersed with strips of natural and/or semi-natural vegetation | 242 | Complex cultivation patterns |
| I1.3  X10 | Arable land with unmixed crops grown by low-intensity agricultural methods  Mosaic landscapes with a woodland element | 243 | Land principally occupied by agriculture, with significant areas of natural vegetation |
| 4 Gewässer | 41 Streams | C2.2-3, 2.42-2.44, 2.6  J5.2  J5.4 | Surface running waters  Highly artificial saline and brackish running waters  Highly artificial non-saline running waters | 511 | Water courses |
| 42 Inland water bodies | C1  J5.11  J5.3 | Surface water stands  Saline and brackish (industrial) lagoons and canals  Highly artificial non-saline standing waters | 512 | Water bodies |
| 43 Marine waters | X02, X03 | Saline / Brackish coastal lagoons | 521 | Coastal lagoons |
| C2.41  X01 | Brackish water tidal rivers  Surface running waters, Estuaries | 522 | Estuaries |
| A3, A4  A5  X31-33 | Infra-/ Circalittoral rock / other substr.  Sublittoral sediment Mosaics of mobile and non-mobile substrata (in diff. zones) | 523 | Sea and ocean |
| A1, A2.1-5 | Littoral sediment | 423 | Intertidal flats |
| 5 Siedlung und Lagerstätte | 51 Buildings and transportation area | J1.1  J1.3  J1.5  J1.7  X24 | Residential buildings of city and town centres  Urban and suburban public buildings  Disused constructions of cities, towns and villages  High density temporary residential units  Domestic gardens of city/town centres | 111 | Continuous urban fabric |
| J1.2  J2.1  J2.2  H5.6  X23  X25 | Residential buildings of villages and urban peripheries  Scattered residential buildings  Rural public buildings  Trampled areas  Large non-domestic gardens  Domestic gardens of villages and urban peripheries | 112 | Discontinuous urban fabric |
| J1.4  J2.3  J2.6 | Rural, Urban, and suburban industrial and commercial sites still in active use  Disused rural constructions | 121 | Industrial and commercial units |
| J4 | Transport networks and other constructed hard-surfaced areas | 122 | Road and rail networks and associated land |
|  |  | 123 | Port areas |
|  |  | 124 | Airports |
| J1.6  J2.7 | Urban and suburban construction and demolition sites  Rural construction and demolition sites | 133 | Construction sites |
| 52 Mining and dump sites | H3.1C  H3.2F  J3 | Disused siliceous quarries  Disused chalk and limestone quarries  Extractive industrial sites | 131 | Mineral extraction sites |
| J6 | Waste deposits | 132 | Dump sites |
| 53 Urban vegetated areas | E2.64  E2.65  X11  X22 | Park lawns  Small-scale lawns Large parks Small city centre non-domestic gardens | 141 | Green urban area |
| E2.63 | Turf sports fields | 142 | Sport and leisure facilities |
